# Supplementary material
Source: MDPI journal article supplement (https://www.mdpi.com/2073-4441/9/12/967)
Supplement: s1 [file s1]

## Sheet: Tabelle1
	Substrate					Elevation in m a.s.l.
Taxon	Stone	Sediment	Bryophytes	Filamentous green-algae	Leaf litter	Minima	Maxima
Achnanthes sp.	X					631	2186
Achnanthes coarctata (Brébisson) Grunow 1880	X	X				2049	2049
Achnanthes didyma Hustedt 1933	X	X				2238	2238
Achnanthes oblongella Oestrup 1902			X			1987	1987
Achnanthes saccula J.R.Carter 1981	X					2238	2238
Achnanthes thermalis (Rabenhorst) Schoenfeldt 1907	X	X	X			520	520
Achnanthes trinodis (W.Smith) Grunow 1880					X	775	775
Achnanthidium sp.		X			X	674	674
Achnanthidium Morphotype "fasciata"	X					1325	1325
Achnanthidium affine (Grunow) Czarnecki 1994	X	X	X	X	X	520	2477
Achnanthidium caledonicum (Lange-Bertalot) Lange-Bertalot 1999	X	X	X	X	X	612	2422
Achnanthidium eutrophilum (Lange-Bertalot) Lange-Bertalot 1999					X	674	674
Achnanthidium gracillimum (Meister) Lange-Bertalot 2004	X					2186	2186
Achnanthidium inconspicuum (Oestrup) Lange-Bertalot	X	X				1987	1987
Achnanthidium kranzii (Lange-Bertalot) Round & Bukhtiyarova 1996	X	X	X		X	830	2477
Achnanthidium lineare W.Smith 1855	X	X	X	X	X	534	2422
Achnanthidium minutissimum (Kützing) Czarnecki 1994	X	X	X	X	X	520	2527
Achnanthidium minutissimum Morphotype "small, wide"	X	X	X	X		760	2527
Achnanthidium minutissimum var. jackii (Rabenhorst) Lange-Bertalot 2004	X	X	X	X	X	520	2422
Achnanthidium minutissimum var. minutissimum (Kützing) Czarnecki 1994		X				2231	2231
Achnanthidium neomicrocephalum Lange-Bertalot & Staab 2004	X		X	X		1231	2077
Achnanthidium pfisteri Lange-Bertalot 2004	X					1550	1550
Achnanthidium pseudolineare Van de Vijver, Novais & Ector 2011		X				573	631
Achnanthidium pyrenaicum (Hustedt) H.Kobayasi 1997	X	X	X	X	X	520	2482
Achnanthidium rivulare Potapova & Ponader 2004	X				X	1325	1325
Achnanthidium rostropyrenaicum Jüttner & Cox 2011	X	X	X	X		1467	2126
Achnanthidium straubianum (Lange-Bertalot) Lange-Bertalot 1999		X				991	991
Achnanthidium strictum Reichardt 2004					X	718	718
Adlafia sp.			X			850	850
Adlafia aquaeductae (Krasske) Lange-Bertalot 1998	X	X	X			650	2527
Adlafia bryophila (Petersen) Moser, Lange-Bertalot & Metzeltin 1998	X	X	X	X	X	520	2527
Adlafia minuscula var. minuscula (Grunow) Lange-Bertalot 1999	X	X	X	X	X	520	2527
Adlafia minuscula var. muralis (Grunow) Lange-Bertalot 1999				X		2098	2098
Adlafia Morphotype "sensu suchlandtii"	X	X	X	X		1584	2238
Adlafia suchlandtii (Hustedt) Lange-Bertalot 1997	X	X	X	X		705	2527
Amphipleura pellucida (Kützing) Kützing 1844	X	X	X			1293	1297
Amphora sp.		X				1717	2231
Amphora copulata (Kützing) Schoemann & Archibald 1986		X	X			760	2477
Amphora inariensis Krammer 1980	X	X	X	X		1228	2527
Amphora indistincta Levkov 2009	X	X	X		X	520	2527
Amphora lange-bertalotii Levkov & Metzeltin 2009		X				2159	2159
Amphora lange-bertalotii var. tenuis Levkov & Metzeltin 2009	X	X	X	X		631	2422
Amphora micra Levkov 2009	X					2238	2238
Amphora ovalis (Kützing) Kützing 1844		X				1312	1312
Amphora pediculus (Kützing) Grunow ex A.W.F.Schmidt 1875	X	X	X	X	X	520	2477
Aulacoseira sp.	X	X		X		534	2063
Aulacoseira distans var. nivalis (W.Smith) E.Y.Haworth 1990	X	X	X			1987	2231
Brachysira sp.			X			2128	2128
Brachysira brebissonii Ross 1986	X	X	X	X		1293	2238
Brachysira calcicola var. calcicola Lange-Bertalot 1994	X	X				2128	2238
Brachysira calcicola var. pfisteri Lange-Bertalot & Werum 2004		X				2238	2238
Brachysira intermedia (Oestrup) Lange-Bertalot 1994	X		X			2000	2231
Brachysira neglectisima Lange-Bertalot 2004	X	X	X	X		650	2063
Brachysira neoexilis Lange-Bertalot 1994	X	X	X	X	X	520	2238
Brachysira zellensis (Grunow) Round & D.G.Mann 1981	X	X	X	X		1945	2422
Caloneis sp.	X	X	X	X	X	631	2477
Caloneis Morphotype "cuneata linearis"	X	X	X	X		520	2527
Caloneis Morphotype "37-39"	X	X	X			1297	2159
Caloneis alpestris (Grunow) Cleve 1894	X	X	X	X	X	625	2527
Caloneis fontinalis Lange-Bertalot & Reichardt 1996	X	X	X	X	X	520	2477
Caloneis lancettula (Schulz-Danzig) Lange-Bertalot & Witkowski 1996	X	X	X	X	X	534	2186
Caloneis lauta J.R.Carter & Bailey-Watts 1981			X			1983	1983
Caloneis lauta Morphotype "round"			X			1312	1312
Caloneis lepidula (Grunow) Cleve 1894			X			2527	2527
Caloneis obtusa (W.Smith) Cleve 1894	X	X				2128	2214
Caloneis pulchra Messikommer 1927		X				1941	1941
Caloneis silicula (Ehrenberg) Cleve 1894	X	X	X	X		1543	2527
Caloneis tenuis (W.Gregory) Krammer 1985	X	X	X	X	X	573	2527
Caloneis vasileyevae Lange-Bertalot, Genkal & Vekhov 2004			X	X		1293	1580
Cavinula intractata (Hustedt) Lange-Bertalot 1996	X	X				2186	2186
Cavinula jaernefeltii (Hustedt) D.G.Mann & Stickle 1990	X					820	820
Cavinula mollica (Hustedt) Lange-Bertalot 1996	X	X		X		612	2238
Cavinula pseudoscutiformis (Hustedt) D.G.Mann & Stickle 1990	X	X	X			2000	2186
Chamaepinnularia sp.		X				2238	2238
Chamaepinnularia begeri (Krasske) Lange-Bertalot 1996	X					2238	2238
Chamaepinnularia hassiaca (Krasske) Cantonati & Lange-Bertalot 2009	X	X				2034	2238
Chamaepinnularia mediocris (Krasske) Lange-Bertalot 1996	X	X	X	X		2000	2231
Chamaepinnularia muscicola (Petersen) Kulikovyskiy, Lange-Bertalot & Witkowski 2009	X		X			2050	2214
Chamaepinnularia submuscicola (Krasske) Lange-Bertalot 2004	X		X	X		991	2527
Cocconeis neothumensis Krammer 1991	X					1376	2477
Cocconeis pediculus Ehrenberg 1838	X	X				534	1550
Cocconeis placentula Ehrenberg 1838	X	X	X	X		534	2477
Cocconeis placentula var. euglypta (Ehrenberg) Grunow 1884	X	X	X	X		665	2422
Cocconeis placentula var. lineata (Ehrenberg) Van Heurck 1885	X		X			1376	1550
Cocconeis placentula var. placentula Ehrenberg 1838			X			1376	1376
Cocconeis pseudolineata (Geitler) Lange-Bertalot 2004	X	X	X			1293	1550
Craticula sp.	X					1580	1580
Craticula ambigua (Ehrenberg) D.G. Mann 1990		X				991	991
Craticula buderi (Hustedt) Lange-Bertalot 2000	X	X	X			775	2050
Cyclotella sp.			X		X	718	2214
Cyclotella cyclopuncta Hakansson & Carter 1990	X					820	820
Cyclotella praetermissa Lund 1951	X					1580	1580
Cymatopleura elliptica (Brébisson) W.Smith 1851			X			1987	1987
Cymatopleura solea (Brébisson) W.Smith 1851		X	X	X		631	1717
Cymatopleura solea var. apiculata (W.Smith) Ralfs 1851	X					1543	1543
Cymbella sp.	X		X			705	1665
Cymbella affinis Kützing 1844	X				X	631	631
Cymbella alpestris Krammer 2002	X	X	X	X		534	2186
Cymbella aspera (Ehrenberg) Cleve 1889	X	X	X	X	X	631	2422
Cymbella compacta Østrup 1910		X		X		1467	1665
Cymbella cymbiformis Agardh 1830	X	X	X	X		1231	2238
Cymbella excisa Kützing 1844	X	X	X			1231	1717
Cymbella excisa var. angusta Krammer 2002	X					1467	1467
Cymbella excisiformis Krammer 2000	X	X		X		1231	2214
Cymbella hantzschiana Krammer 2002	X	X	X	X	X	534	2422
Cymbella hustedtii var. hustedtii Krasske 1923	X	X			X	775	2179
Cymbella laevis Nägeli 1849	X	X	X	X		1580	2159
Cymbella lancettula (Krammer) Krammer 2002	X	X	X	X		631	2179
Cymbella lange-bertalotii Krammer 2002	X		X	X		1228	2077
Cymbella neogena (Grunow) Krammer 2002		X				991	991
Cymbella neoleptoceros Krammer 2002		X				1297	1297
Cymbella parva (W.Smith) Kirchner 1878	X	X	X	X	X	725	2422
Cymbella peraspera Krammer 2002	X	X	X			2128	2214
Cymbella vulgata var. vulgata Krammer 2002			X	X		612	1717
Cymbopleura sp.		X	X		X	534	2179
Cymbopleura Morphotype "large diminuta"			X			850	850
Cymbopleura anglica (Lagerstedt) Krammer 2003		X				1941	1941
Cymbopleura austriaca (Grunow) Krammer 2003		X	X		X	534	1770
Cymbopleura diminuta (Grunow) Krammer 2003		X	X	X	X	520	1717
Cymbopleura florentina var. brevis Krammer 2003				X		1955	1955
Cymbopleura frequens Krammer 2003	X	X	X		X	631	2214
Cymbopleura frequens var. frequens Krammer 2003			X	X		1770	2186
Cymbopleura frequens var. rivularis Krammer 2003	X					2186	2186
Cymbopleura incerta (Grunow) K.Krammer 2003	X		X			1955	2231
Cymbopleura korana Krammer 2003		X	X		X	534	2159
Cymbopleura laeviformis Krammer 2003			X			1770	1770
Cymbopleura naviculiformis (Auerswald) Krammer 2003	X	X	X	X		631	2527
Cymbopleura peranglica Krammer 2003			X			2186	2186
Cymbopleura rhomboidea var. angusta Krammer 2003			X			1717	1717
Cymbopleura subaequalis (Grunow) Krammer 2003	X	X	X	X	X	520	2527
Cymbopleura subaequalis var. truncata Krammer 2003		X	X			650	2111
Cymbopleura subaustriaca Krammer 2003	X	X	X		X	520	2179
Cymbopleura sublancettula Krammer 2003	X					2238	2238
Delicata delicatula (Kützing) Krammer 2003	X	X	X	X	X	534	2179
Delicata delicatula var. alpestris (Kützing) Krammer 2003			X			1770	1770
Delicata minuta Krammer 2003	X	X				2063	2063
Denticula elegans Kützing 1844					X	534	534
Denticula tenuis Kützing 1844	X	X	X	X	X	520	2422
Diadesmis sp.	X		X			820	2482
Diadesmis brekkaensis (Petersen) D.G.Mann 1990		X	X			675	2238
Diadesmis contenta (Grunow ex Van Heurck) D.G.Mann 1990	X	X	X			520	2073
Diadesmis paracontenta Lange-Bertalot & Werum 2001			X		X	675	718
Diadesmis perpusilla (Grunow) D.G.Mann 1990	X	X	X	X	X	520	2482
Diadesmis simplex Reichardt 2004	X					1550	1550
Diatoma sp.	X					2238	2238
Diatoma ehrenbergii Kützing 1848	X				X	718	1550
Diatoma hyemalis (Roth) Heidberg 1863	X	X	X	X		1987	2098
Diatoma hyemalis var. maxima (Grunow) Meister 1950	X	X	X			1228	1987
Diatoma mesodon (Ehrenberg) Kützing 1844	X	X	X	X		625	2482
Diatomella balfouriana Greville 1855	X	X	X	X		725	2422
Diploneis sp.		X	X			1983	1983
Diploneis elliptica (Kützing) Cleve 1891	X	X	X			631	2477
Diploneis fontanella Lange-Bertalot 2004	X	X	X	X	X	520	2238
Diploneis fontium Reichardt & Lange-Bertalot 2004	X	X	X			1543	2111
Diploneis krammeri Lange-Bertalot & Reichardt 2004	X	X	X	X	X	520	2477
Diploneis marginestriata Hustedt 1922			X			2111	2111
Diploneis minuta Petersen 1928		X	X		X	534	1770
Diploneis oculata (Brebisson) Cleve 1894	X	X				2063	2238
Diploneis petersenii Hustedt 1937	X	X	X	X		534	2527
Diploneis separanda Lange-Bertalot & Reichardt 2004	X	X	X	X	X	520	2422
Encyonema sp.		X				2034	2231
Encyonema alpiniforme Krammer 1997			X			718	718
Encyonema alpinum (Grunow) D.G.Mann 1990	X	X	X	X	X	534	2214
Encyonema bipartitum (A.Mayer) Krammer 1997	X	X	X	X	X	534	2477
Encyonema caespitosum Kützing 1849	X					820	1580
Encyonema elginense (Krammer) D.G.Mann 1990	X					2527	2527
Encyonema fogedii Krammer 1997				X		2186	2186
Encyonema hebridicum (Grunow) Cleve 1891	X	X	X			1987	2477
Encyonema lange-bertalotii Krammer 1997	X	X	X	X	X	775	2482
Encyonema lunatum (W.Smith) van Heurck 1880	X	X	X	X		1983	2527
Encyonema minutum (Hilse) D.G.Mann 1990	X	X	X	X	X	534	2527
Encyonema norvegicum (Grunow) Mayer 1947			X			1955	1955
Encyonema perpusillum (Cleve) D.G.Mann 1990	X	X	X	X		612	2422
Encyonema silesiacum (Bleisch) D.G.Mann 1990	X	X	X	X		1228	2527
Encyonema silesiacum var. silesiacum (Bleisch) D.G.Mann 1990			X	X		1543	1987
Encyonema simile Krammer 1997			X			2527	2527
Encyonema sublangebertalotii Lange-Bertalot & Cantonati 2010			X	X		1231	1543
Encyonema ventricosum (C.Agardh) Grunow 1885	X	X	X	X	X	725	2477
Encyonema vulgare var. vulgare Krammer 1997	X	X	X	X	X	760	2527
Encyonopsis sp.	X	X	X	X	X	520	2422
Encyonopsis Morphotype "small lanceola"	X	X	X	X		760	2422
Encyonopsis cesatii (Rabenhorst) Krammer 1997	X	X	X	X	X	520	2527
Encyonopsis descripta (Hustedt) Krammer 1997		X				2111	2111
Encyonopsis descripta var. asymmetrica (Hustedt) Krammer 1997	X	X				1212	1286
Encyonopsis falaisensis (Grunow) Krammer 1997	X	X	X	X	X	534	2422
Encyonopsis grunowii Krammer 1997	X	X	X	X		2000	2238
Encyonopsis krammeri Reichardt 1997	X	X	X			665	2238
Encyonopsis lanceola (Grunow) Krammer 1997	X		X	X		1770	2063
Encyonopsis microcephala (Grunow) Krammer 1997	X		X			718	2186
Encyonopsis microcephala s.l. (Grunow) Krammer 1997	X	X	X		X	534	2527
Encyonopsis minuta Krammer & Reichardt 1997	X		X	X	X	534	2214
Encyonopsis perborealis Krammer 1997				X		1987	1987
Encyonopsis rostrata Krammer 1997		X			X	775	775
Encyonopsis subminuta Krammer & Reichardt 1997	X	X	X			625	2527
Encyonopsis tiroliana Krammer & Lange-Bertalot 1997	X	X	X			1580	1941
Encyonopsis tiroliana Morphotyp "less wide and cuneata" Krammer & Lange-Bertalot 1997				X		1955	1955
Eolimna minima (Grunow) Lange-Bertalot 1998	X	X	X	X	X	520	2527
Eolimna silvahercynica (Lange-Bertalot) Lange-Bertalot 2004		X				1293	1293
Eolimna subadnata (Hustedt) Lange-Bertalot 1998	X	X				520	520
Eolimna subminuscula (Manguin) Moser, Lange-Bertalot & Metzeltin 1998	X		X			534	718
Epithemia sp.			X			534	534
Epithemia adnata (Kützing) Brébisson 1838	X	X	X			2000	2238
Epithemia argus var. alpestris (W.Smith) Grunow 1862			X			2231	2231
Epithemia turgida (Ehrenberg) Kützing 1844					X	674	674
Eucocconeis alpestris (Brun) Lange-Bertalot 1999	X	X	X			2128	2238
Eucocconeis flexella (Kützing) F.Meister 1912	X	X	X	X	X	534	2422
Eucocconeis laevis (Oestrup) Lange-Bertalot 1999	X	X	X	X	X	534	2477
Eunotia sp.	X	X	X		X	674	2482
Eunotia Morphotype "1"			X			675	1717
Eunotia ambivalens Lange-Bertalot & Tagliaventi 2011	X					2214	2214
Eunotia arcubus Nörpel & Lange-Bertalot 1993	X	X	X	X	X	520	2422
Eunotia arcus Ehrenberg 1837	X	X	X	X		775	2238
Eunotia bilunaris s. str. (Ehrenberg) Mills 1880	X	X	X	X		1325	2238
Eunotia bilunaris s.l. (Ehrenberg) Mills 1880		X			X	612	2238
Eunotia boreoalpina Noerpel-Schempp & Lange-Bertalot 1998	X	X	X	X		1983	2238
Eunotia cantonatii Lange-Bertalot & Tagliaventi 2011	X	X	X	X		2034	2238
Eunotia cisalpina Lange-Bertalot & Cantonati 2011	X	X	X			1325	2050
Eunotia curtagrunowii Noerpel-Schempp & Lange-Bertalot 1996	X	X	X		X	1325	2073
Eunotia elena Lange-Bertalot 2011	X					2128	2128
Eunotia exigua (Brébisson) Rabenhorst 1864	X	X	X			2050	2238
Eunotia glacialifalsa Lange-Bertalot 2000					X	1325	1325
Eunotia glacialis Meister 1912		X				2238	2238
Eunotia glacialispinosa Lange-Bertalot & Cantonati 2010	X	X	X		X	1293	2214
Eunotia islandica Oestrup 1918	X	X	X	X	X	1325	2482
Eunotia juettnerae Lange-Bertalot 2011	X		X	X		1987	2214
Eunotia minor (Kützing) Grunow 1881	X	X	X	X	X	674	2527
Eunotia Morphotype "2"			X	X		1983	2231
Eunotia Morphotype "3"		X	X	X		1983	2231
Eunotia naegelii Migula 1907	X					2050	2050
Eunotia neocompacta var. neocompacta Mayama & Kawashima 1998				X		1231	1231
Eunotia neocompacta var. vixcompacta Lange-Bertalot 2011	X					2231	2231
Eunotia nymanniana Grunow 1880		X	X			1228	2034
Eunotia praerupta Ehrenberg 1843		X				2050	2050
Eunotia pseudogroenlandica (Grunow) Lange-Bertalot & Nörpel 1996			X			2477	2477
Eunotia rhomboidea Hustedt 1950	X	X	X			2000	2050
Eunotia subarcuatoides Alles, Nörpel & Lange-Bertalot 1991	X		X			1312	2231
Eunotia tenella (Grunow) Hustedt 1913		X	X			2034	2073
Eunotia tetraodon Ehrenberg 1838	X	X	X	X		2000	2238
Eunotia valida Hustedt 1930		X		X		2077	2214
Fallacia sp.			X		X	830	1717
Fallacia insociabilis (Krasske) D.G.Mann 1990		X	X	X	X	520	1543
Fallacia lange-bertalotii (Reichardt) Reichardt 2000	X	X	X	X	X	520	2179
Fallacia monoculata (Hustedt) D.G. Mann 1990	X	X	X			520	1312
Fallacia subhamulata (Grunow) D.G.Mann 1990				X		612	612
Fallacia sublucidula (Hustedt) D.G. Mann 1990	X			X		520	612
Fragilaria sp.	X	X	X	X		725	2238
Fragilaria acus (Kützing) Lange-Bertalot 2000	X		X	X		612	612
Fragilaria amphicephaloides Lange-Bertalot 2011	X	X	X	X		612	2179
Fragilaria austriaca (Grunow) Lange-Bertalot 2000	X	X	X			725	2238
Fragilaria capucina var. capucina Desmazières 1825		X	X			1987	2000
Fragilaria delicatissima (W.Smith) Lange-Bertalot 1980	X	X	X	X	X	520	2238
Fragilaria gracilis Oestrup 1910	X	X	X	X		612	2238
Fragilaria pararumpens Lange-Bertalot & Hofmann & Werum 2011			X			2073	2073
Fragilaria parasitica var. parasitica (W.Smith) Grunow 1881	X	X	X	X		1228	2422
Fragilaria perminuta (Grunow) Lange-Bertalot 2000		X				534	534
Fragilaria radians (Kützing) Williams & Round 1987			X	X		1665	1955
Fragilaria tenera (W.Smith) Lange-Bertalot 1980	X	X	X			2128	2186
Fragilaria ulna (Nitzsch) Lange-Bertalot 1981	X	X	X	X		534	2422
Fragilaria vaucheriae (Kützing) Petersen 1938	X	X	X	X		1228	2422
Fragilariforma virescens (Ralfs) D.M.Williams & Round 1988	X	X	X	X		1983	2231
Frustulia crassinervia (Brébisson) Lange-Bertalot & Krammer 1996	X	X	X	X		1987	2527
Frustulia saxonica Rabenhorst 1853	X	X	X	X		2000	2238
Frustulia vulgaris (Thwaites) De Toni 1891	X	X	X	X	X	612	2422
Geissleria sp.	X					2527	2527
Geissleria acceptata (Hustedt) Lange-Bertalot & Metzeltin 1996	X	X	X			2238	2482
Geissleria dolomitica (Bock) Lange-Bertalot & Metzeltin 1996	X					1987	1987
Geissleria paludosa Morphotyp 2 (Hustedt) Lange-Bertalot & Metzeltin 1996	X		X		X	718	2000
Geissleria schoenfeldii (Hustedt) Lange-Bertalot & Metzeltin 1996		X				1376	1376
Gomphonema sp.	X	X	X	X	X	520	2186
Gomphonema Morphotype "2"			X			674	674
Gomphonema acidoclinatum Lange-Bertalot & Reichardt 2004	X	X				2214	2214
Gomphonema acuminatum Ehrenberg 1836	X		X			2000	2000
Gomphonema amoenum Lange-Bertalot 1985	X	X	X	X		2238	2238
Gomphonema angustatum (Kützing) Rabenhorst 1864	X	X	X	X	X	573	2422
Gomphonema angustum C. Agardh 1830	X	X	X	X	X	520	2422
Gomphonema auritum A. Braun 1849	X	X	X	X		674	2422
Gomphonema capitatum Ehrenberg 1838	X		X	X		1231	2063
Gomphonema clavatum Ehrenberg 1832	X	X	X	X		1228	2238
Gomphonema cymbelliclinum Reichardt & Lange-Bertalot 1999	X	X	X	X	X	631	2186
Gomphonema drutelingense Reichardt 1999		X	X	X		1945	2050
Gomphonema elegantissimum Reichardt & Lange-Bertalot 2011	X		X			775	2477
Gomphonema exilissimum (Grunow) Lange-Bertalot & Reichardt 1996	X	X	X	X		674	2527
Gomphonema extentum Reichardt & Lange-Bertalot 1999			X			1580	1580
Gomphonema hebridense Gregory 1854	X	X	X	X		625	2527
Gomphonema innocens Reichardt 1999		X				1293	1293
Gomphonema italicum Kützing 1944	X	X				2000	2128
Gomphonema lateripunctatum Reichardt & Lange-Bertalot 1991	X	X	X	X	X	534	2214
Gomphonema lippertii Lange-Bertalot & Reichardt 1999			X			675	675
Gomphonema micropus Kützing 1844	X	X	X	X	X	520	2422
Gomphonema micropus Morphotyp aequalidictum Kützing 1844	X	X			X	1325	1987
Gomphonema micropus Morphotyp elongatum Kützing 1844	X		X			1580	1580
Gomphonema micropus Morphotyp schlankere Form Var. nov. ? Kützing 1844	X	X	X	X	X	665	1580
Gomphonema micropus var. micropus Kützing 1844	X		X			1580	1580
Gomphonema minusculum Krasske 1932	X					1293	1293
Gomphonema montanum Schumann 1867	X	X	X	X		1665	2186
Gomphonema occultum Reichardt & Lange-Bertalot 1991		X	X			573	1717
Gomphonema olivaceoides Hustedt 1950	X		X			775	1983
Gomphonema olivaceolacuum (Lange-Bertalot & Reichardt) Lange-Bertalot 2004	X					820	820
Gomphonema olivaceum var. olivaceum (Hornemann) Brébisson 1838	X	X		X		1376	2063
Gomphonema pala Reichardt 2001	X	X	X	X		1293	2238
Gomphonema parvulius (Lange-Bertalot & Reichardt) Lange-Bertalot & Reichardt 1996	X	X	X	X		991	2238
Gomphonema parvulum var. parvulum f. parvulum Kützing 1849	X	X	X	X	X	674	2527
Gomphonema parvulum var. parvulum Kützing 1849		X				2050	2111
Gomphonema parvulum var. parvulum f. saprophilum Kützing 1849		X				991	991
Gomphonema productum (Grunow) Lange-Bertalot & Reichardt 1993		X	X		X	1325	2000
Gomphonema pseudobohemicum Lange-Bertalot & Reichardt 1993	X	X			X	830	2128
Gomphonema pumilum (Grunow) Reichardt & Lange-Bertalot 1991	X	X	X	X	X	534	2482
Gomphonema pumilum var. pumilum (Grunow) Reichardt & Lange-Bertalot 1991	X	X				1293	1376
Gomphonema pumilum var. rigidum Reichardt & Lange-Bertalot 1997		X	X			612	1376
Gomphonema sarcophagus Gregory 1856			X			650	650
Gomphonema sphenovertex Lange-Bertalot & Reichardt 1996	X	X	X	X		1543	2050
Gomphonema subclavatum (Grunow) Grunow 1885	X	X	X	X	X	573	2422
Gomphonema tergestinum (Grunow) Fricke 1902	X	X	X			1550	2179
Gomphonema truncatum Ehrenberg 1832	X		X	X		1543	2186
Gomphonema utae Lange-Bertalot & Reichardt 1999	X	X	X	X	X	534	2238
Gomphonema variostigmatum Reichardt 2002	X					1376	1376
Gomphonema vibrio Ehrenberg 1843		X	X	X		534	1717
Gomphosphenia fontinalis Lange-Bertalot, Ector & Werum 2004	X	X	X			820	1360
Gyrosigma obtusatum (Sullivant & Wormley) Boyer 1922	X	X	X			631	820
Halamphora montana (Krasske) Levkov 2009	X	X				520	820
Halamphora normanii (Rabenhorst) Levkov 2009	X	X	X		X	520	2477
Hannaea arcus (Ehrenberg) Patrick 1966	X	X	X	X		1376	2238
Hantzschia sp.		X				1312	1312
Hantzschia abundans Lange-Bertalot 1993		X		X		612	612
Hantzschia amphioxys (Ehrenberg) Grunow 1880		X	X	X		612	1584
Hantzschia calcifugia Reichardt & Lange-Bertalot 2004	X	X	X			520	1360
Hygropetra balfouriana (Grunow) Krammer & Lange-Bertalot 2000	X	X	X	X		1297	2238
Karayevia clevei var. clevei (Grunow) Bukthiyarova 1999	X	X	X			1228	1297
Kobayasiella parasubtilissima (Kobayasi & Nagumo) Lange-Bertalot 1999	X	X	X			1335	2527
Lemnicola hungarica (Grunow) Round & Basson 1997	X	X		X	X	674	1550
Luticola goeppertiana (Bleisch) D.G.Mann 1990			X			675	675
Luticola mutica (Kützing) D.G. Mann 1990	X	X	X			612	2482
Luticola nivalis (Ehrenberg) D.G. Mann 1990	X	X	X			2049	2049
Luticola ventriconfusa Lange-Bertalot 2003	X					612	612
Luticola ventricosa (Kützing) D.G. Mann 1990		X				612	991
Mayamaea atomus var. permitis (Hustedt) Lange-Bertalot 1997	X		X			2482	2482
Mayamaea fossalis var. fossalis (Krasske) Lange-Bertalot 1997		X				2482	2482
Meridion circulare var. circulare (Greville) C.Agardh 1831	X	X	X	X	X	520	2482
Meridion circulare var. constrictum (Ralfs) van Heurck 1880	X	X	X	X		1983	2214
Microcostatus krasskei (Hustedt) Johansen & Sray 1998		X				2186	2186
Navicula sp.	X	X	X			674	2214
Navicula angusta Grunow 1860	X	X	X	X		2128	2238
Navicula antonii Lange-Bertalot 2000	X	X	X	X		612	1717
Navicula aquaedurae Lange-Bertalot 1993			X			1312	2422
Navicula arvensis Hustedt 1937			X			2477	2477
Navicula brockmanni Hustedt 1934	X	X				1665	2000
Navicula cari Ehrenberg 1836			X			1665	1665
Navicula cariocincta Lange-Bertalot 2000		X	X			760	760
Navicula cataracta-rheni Lange-Bertalot 1993	X	X	X	X	X	775	1717
Navicula cincta (Ehrenberg) Ralfs 1861		X				1212	1212
Navicula crassulexigua Reichardt 1993	X	X				520	1335
Navicula cryptocephala Kützing 1844	X	X	X	X	X	520	2527
Navicula cryptotenella Lange-Bertalot 1985	X	X	X	X	X	534	2527
Navicula cryptotenelloides Lange-Bertalot 1993		X	X			650	1335
Navicula dealpina Lange-Bertalot 1993	X	X	X	X		1293	1941
Navicula difficillima Hustedt 1950		X				2477	2477
Navicula digna Hustedt 1957	X	X	X	X		631	2422
Navicula exilis Kützing 1844	X	X	X			520	2482
Navicula heimansioides Lange-Bertalot 1993	X		X			1941	2126
Navicula hintzii Lange-Bertalot 1993	X	X	X			1293	2179
Navicula lacuum Lange-Bertalot, G. Hofmann, Werum & Van de Vijver 2009	X	X		X		612	1286
Navicula leistikowii Lange-Bertalot 1993	X	X	X	X	X	573	2482
Navicula lundii Reichardt 1985	X	X	X			1665	2179
Navicula moenofranconica Lange-Bertalot 1993		X			X	674	760
Navicula oligotraphenta Lange-Bertalot & Hofmann 1993	X	X	X			1543	2422
Navicula radiosa Kützing 1844	X	X	X	X	X	631	2527
Navicula recens (Lange-Bertalot) Lange-Bertalot 1985			X			1312	1312
Navicula reichardtiana Lange-Bertalot 1989	X	X	X			612	1941
Navicula seibigiana Lange-Bertalot 1993		X				991	991
Navicula striolata (Grunow) Lange-Bertalot 1985		X				1297	1297
Navicula stroemii Hustedt 1931		X	X			775	2126
Navicula tenelloides Hustedt 1937	X	X	X	X	X	991	2111
Navicula tridentula Krasske 1923	X	X	X			2098	2477
Navicula tripunctata (O.F.Müller) Bory de Saint-Vincent 1822	X	X	X	X		520	1467
Navicula trivialis Lange-Bertalot 1980	X	X				612	2186
Navicula veneta Kützing 1880				X		991	991
Navicula vilaplanii (Lange-Bertalot & Sabater) Lange-Bertalot & Sabater 2000		X				1665	1665
Navicula viridulacalcis Lange-Bertalot 2000	X	X	X			1717	1717
Navicula wildii Lange-Bertalot 1993			X			1228	1543
Naviculadicta sp.	X			X	X	991	2063
Naviculadicta pauxilla Reichardt 2006	X	X				2000	2422
Neidiomorpha binodiformis (Krammer) Cantonati, Lange-Bertalot & Angeli 2010	X	X	X			760	2186
Neidiopsis levanderi (Hustedt) Lange-Bertalot & Metzeltin 1999		X				2186	2186
Neidium sp.	X	X				2111	2186
Neidium affine (Ehrenberg) Pfitzer 1871			X			2186	2186
Neidium affine Sippe "kopfig"	X	X	X	X		2000	2077
Neidium ampliatum (Ehrenberg) Krammer 1985	X	X	X	X		1717	2477
Neidium bisulcatum var. bisulcatum (Lagerstedt) Cleve 1894	X	X	X			1983	2527
Neidium bisulcatum var. subampliatum Krammer 1985			X			1987	1987
Neidium cuneatiforme Levkov 2007	X	X				1717	2422
Neidium dubium (Ehrenberg) Cleve 1894	X		X			2422	2422
Neidium longiceps (Gregory) Ross 1947		X				1665	2034
Neidium productum var. productum (W.Smith) Cleve 1894			X			1543	1543
Nitzschia sp.	X	X	X	X	X	520	2527
Nitzschia Morphotype "2"		X	X	X	X	520	2128
Nitzschia acidoclinata Lange-Bertalot 1977	X	X	X	X	X	718	2482
Nitzschia alpina Hustedt 1943	X	X	X	X	X	1228	2527
Nitzschia alpinobacillum Lange-Bertalot 1993	X	X	X	X		534	2186
Nitzschia amphibia Grunow 1862	X	X	X	X	X	534	1770
Nitzschia angustata (W.Smith) Grunow 1880	X	X	X	X		1580	2422
Nitzschia angustatula Lange-Bertalot 1987		X	X			573	1665
Nitzschia archibaldii Lange-Bertalot 1980				X		991	991
Nitzschia debilis (Arnott) Grunow 1880			X			698	698
Nitzschia dissipata ssp. dissipata (Kützing) Grunow 1862	X	X	X		X	612	2186
Nitzschia dissipata var. media (Hantzsch) Grunow 1861	X	X	X			1312	2159
Nitzschia fonticola Grunow 1879				X		1376	1376
Nitzschia frequens Hustedt 1957	X		X	X		612	612
Nitzschia frustulum var. frustulum (Kützing) Grunow 1880			X			650	650
Nitzschia hantzschiana Rabenhorst 1660	X	X	X	X		573	2482
Nitzschia linearis var. linearis (C.Agardh) W.Smith 1853	X	X	X	X	X	534	2422
Nitzschia palea (Kützing) W.Smith 1856	X	X	X	X		612	2098
Nitzschia palea var. debilis (Kützing) Grunow 1880	X	X	X	X	X	991	2152
Nitzschia paleacea (Grunow) Grunow 1881		X	X			631	631
Nitzschia perminuta (Grunow) Peragallo 1903	X	X	X	X		534	2238
Nitzschia recta Hantzsch 1862		X		X		1665	1717
Nitzschia sinuata (W.Smith) Grunow 1880	X	X	X	X	X	991	2186
Nitzschia solgensis Cleve-Euler 1952	X		X			991	1231
Nitzschia strelnikovae Lange-Bertalot, Genkal & Vekhov 1999		X	X	X		1293	2527
Nitzschia subtilis Grunow 1880			X			1543	1543
Nitzschia supralitorea Lange-Bertalot 1979	X					1550	1550
Nupela lapidosa (Krasske) Lange-Bertalot 1999	X	X		X		2034	2482
Nupela silvahercynica (Lange-Bertalot) Lange-Bertalot 1996	X	X	X			2477	2482
Pinnularia sp.	X	X	X	X	X	534	2527
Pinnularia Morphotype "Table 17"	X	X	X			1312	2000
Pinnularia acidophila Hofmann & Krammer 2000					X	1325	1325
Pinnularia borealis Ehrenberg 1843	X	X	X	X		1543	2482
Pinnularia brebissonii (Kützing) Rabenhorst 1864		X		X		991	1717
Pinnularia brebissonii var. minuta Krammer 2000	X	X	X			1543	2128
Pinnularia divergens var. divergens W.Smith 1853		X				2128	2128
Pinnularia divergens var. linearis Østrup 1910	X					2128	2128
Pinnularia divergens var. sublinearis Cleve 1895			X			2527	2527
Pinnularia divergentissima (Grunow) Cleve 1895	X	X		X		1983	1987
Pinnularia divergentissima var. minor Krammer 1992	X					2231	2231
Pinnularia frequentis Krammer 2000	X	X	X		X	612	2238
Pinnularia gibba var. gibba Morphotyp 2 Ehrenberg 1843	X		X			2000	2000
Pinnularia graciloides var. triundulata (Fontell) Krammer 2000			X			2527	2527
Pinnularia grunowii Krammer 2000		X	X			1325	2186
Pinnularia isselana Krammer 2000		X	X			991	2231
Pinnularia marchica Schönfelder 2000	X	X	X			1293	2186
Pinnularia microstauron (Ehrenberg) Cleve 1891	X	X	X	X		534	2527
Pinnularia microstauron var. rostrata Krammer 2000			X			1987	1987
Pinnularia neglectiformis Krammer 2000	X					2231	2231
Pinnularia neomajor Krammer 1992		X	X			1293	1987
Pinnularia nodosa (Ehrenberg) W. Smith 1856			X			2050	2050
Pinnularia notabilis Krammer 1985			X			1955	1955
Pinnularia obscura Krasske 1932		X	X			850	2111
Pinnularia ovata var. ovata Krammer 2000		X				2034	2128
Pinnularia peracuminata Krammer 2000	X		X			1983	1983
Pinnularia perirorrata Krammer 2000	X	X	X	X		631	2482
Pinnularia rhombarea var. rhombarea Krammer 1998			X			2231	2231
Pinnularia rupestris Hantzsch 1861	X	X	X			674	2527
Pinnularia schoenfelderi Krammer 1992	X	X	X			760	2111
Pinnularia silvatica Petersen 1935	X	X	X			1983	2231
Pinnularia sinistra Krammer 1992	X	X	X			1584	2527
Pinnularia stomatophora (Grunow) Cleve 1891	X	X	X	X		1293	2238
Pinnularia subcapitata var. subcapitata Gregory 1856	X		X			2049	2231
Pinnularia subcommutata var. subcommutata Krammer 1992		X				1228	1293
Pinnularia subrupestris Krammer 1992	X	X	X	X		573	2231
Pinnularia viridiformis Krammer 1992	X	X	X	X		2000	2238
Pinnularia viridiformis var. minor Krammer 2000	X		X			760	760
Pinnularia viridiformis var. viridiformis Krammer 1992	X	X	X	X		1543	2231
Pinnularia viridis (Nitzsch) Ehrenberg 1843	X	X	X		X	674	2527
Placoneis sp.		X			X	1325	1325
Placoneis ignorata (Schimanski) Lange-bertalot 2000		X				1297	1297
Placoneis paraelginensis Lange-Bertalot 2000		X	X			675	1543
Planothidium sp.	X	X	X	X		1297	2186
Planothidium Morphotype "robust parvulum"		X				2034	2034
Planothidium biporomum (Hohn & Hellerman) Lange-Bertalot 1999			X			1987	1987
Planothidium dubium (Grunow) Round & Bukhtiyarova 1996	X	X	X	X		1231	1580
Planothidium frequentissimum (Lange-Bertalot) Lange-Bertalot 1999	X	X	X	X	X	520	2482
Planothidium lanceolatum (Brébisson ex Kützing) Lange-Bertalot 1999	X	X	X	X	X	520	2477
Platessa sp.	X					2477	2477
Psammothidium sp.	X	X	X	X		1293	2527
Psammothidium acidoclinatum (Lange-Bertalot) Lange-Bertalot 1999	X	X	X	X		1987	2231
Psammothidium bioretii (Germain) Bukhtiyarova & Round 1996	X	X	X	X		1983	2527
Psammothidium bristolicum Bukhtiyarova 1996		X	X			1955	2050
Psammothidium daonense (Lange-Bertalot) Lange-Bertalot 1999	X	X	X	X		665	2482
Psammothidium grischunum (Wuthrich) Bukhtiyarova & Round 1996	X	X	X	X	X	520	2238
Psammothidium helveticum (Hustedt) Bukhtiyarova & Round 1996	X	X	X	X		2034	2231
Psammothidium perpusillum (Carter) Bukhtiyarova & Round 1996				X		1945	1945
Psammothidium rechtense (Leclercq) Lange-Bertalot 1999	X		X	X		2050	2238
Psammothidium subatomoides (Hustedt) L.Bukhtiyarova & Round 1996	X	X	X	X	X	1312	2527
Reimeria fontinalis Levkov 2010	X	X	X	X		631	2482
Reimeria sinuata (W.Gregory) Kociolek & Stoermer 1987	X	X	X	X	X	573	2477
Reimeria uniseriata Sala, Guerrero & Ferrario 1993	X	X	X			1312	2422
Rhoicosphenia abbreviata (C.Agardh) Lange-Bertalot 1980			X	X		612	612
Rhopalodia gibba (Ehrenberg) Otto Müller 1895				X		991	991
Rhopalodia parallela (Grunow) O. Müller 1895	X	X	X	X		1580	2214
Rossithidium petersenii (Hustedt) Round & Bukhtiyarova 1996	X	X	X	X	X	631	2527
Rossithidium pusillum (Grunow) Round & Bukhtiyarova 1996	X	X	X	X	X	612	2527
Sellaphora sp.	X	X			X	534	2186
Sellaphora Morphotype "small pseudopupula"	X		X			2527	2527
Sellaphora bacillum (Ehrenberg) D.G. Mann 1989	X	X	X	X		1717	2527
Sellaphora joubaudii (Germain) Aboal 2003	X	X	X	X	X	534	2186
Sellaphora laevissima (Kützing) D.G. Mann 1989			X			2527	2527
Sellaphora mutata (Krasske) Lange-Bertalot 1996				X	X	520	1987
Sellaphora pseudopupula (Krasske) Lange-Bertalot 1996	X	X	X	X	X	520	2527
Sellaphora pseudopupula Morphotype "very long"			X			1312	1312
Sellaphora pupula (Kützing) Mereschkowsky 1902	X	X	X	X		612	2422
Sellaphora seminulum (Grunow) D.G.Mann 1989	X	X				775	2238
Sellaphora stroemii (Hustedt) D.G. Mann 1989	X	X	X			573	2179
Sellaphora stroemii Morphotyp 8		X	X			534	1580
Simonsenia delognei (Grunow) Lange-Bertalot 1979		X	X			631	1312
Stauroforma exiguiformis (Lange-Bertalot) Flower, V.J.Jones & Round 1996	X	X	X	X		1983	2077
Stauroneis sp.	X	X	X	X		612	1665
Stauroneis acidoclinata Lange-Bertalot & Werum 2004	X	X	X			1543	2527
Stauroneis agrestis Petersen 1915	X	X	X		X	1325	2186
Stauroneis anceps Ehrenberg 1843			X			2231	2231
Stauroneis gracilis Ehrenberg 1843	X	X	X			1543	2231
Stauroneis kriegerii Patrick 1945				X		991	991
Stauroneis parathermicola Lange-Bertalot 2011	X	X	X	X	X	520	2159
Stauroneis prominula (Grunow) Hustedt 1959	X					2527	2527
Stauroneis pseudagrestis Lange-Bertalot & Werum 2004	X	X	X			1543	2477
Stauroneis pseudosubobtuoides Germain 1980	X					1325	1325
Stauroneis reichardtii Lange-Bertalot, Cavacini, Tagliaventi & Alfinito 2003	X	X	X			520	2063
Stauroneis separanda Lange-Bertalot & Werum 2004	X	X	X	X		534	1665
Stauroneis smithii Grunow 1860	X	X	X			631	2477
Stauroneis subgracilis Lange-Bertalot & Krammer 1999	X	X		X		1543	2159
Stauroneis thermicola (Petersen) Lund 1946	X	X	X			534	2482
Staurosira sp.	X			X		1293	1945
Staurosira brevistriata (Grunow) Grunow 1884		X	X			1228	2214
Staurosira mutabilis (W.Smith) Grunow 1881	X	X	X	X	X	631	2527
Staurosira oldenburgiana Hustedt 1959	X	X	X	X	X	1325	2527
Staurosira pinnata Ehrenberg 1843	X	X	X	X	X	1325	2422
Staurosira robusta (Fusey) Lange-Bertalot 2000	X	X	X	X		1293	2422
Staurosira venter (Ehrenberg) Grunow 1889	X	X	X	X	X	520	2238
Stenopterobia delicatissima (Lewis) Brébisson 1896		X				2238	2238
Stephanodiscus sp.			X			830	830
Stephanodiscus minutulus (Kützing) Cleve & Moeller 1882		X	X			520	2482
Surirella angusta Kützing 1844	X	X	X	X		612	2186
Surirella brebissonii var. kuetzingii Krammer & Lange-Bertalot 1987		X	X			573	573
Surirella helvetica Brun 1880	X	X	X	X		1717	2422
Surirella linearis W.Smith 1853	X	X		X		2077	2527
Surirella minuta Brébisson ex Kuetzing 1849	X	X	X	X		612	2063
Surirella roba Leclercq 1983		X				2034	2238
Surirella spiralis Kützing 1844	X	X	X			760	2159
Surirella subsalsa W.Smith 1853		X	X			2111	2231
Surirella terricola Lange-Bertalot & Alles 1996	X	X	X		X	631	2179
Tabellaria flocculosa (Roth) Kützing 1844	X	X	X	X		1293	2238
Tetracyclus rupestris (Braun) Grunow 1881	X	X	X	X	X	520	2238
